RESEARCH ARTICLE

# Disrupted cholesterol biosynthesis and hair follicle stem cell impairment in the onset of alopecia

Leemon Nikhila<sup>1</sup>, Suresh Surya<sup>1</sup>, Shahul Hameed Najeeb<sup>1</sup>,  
Thankachan Mangalathettu Binumon<sup>1</sup>, Aayush Gupta<sup>2</sup>, Sandeep Gopalakrishnan<sup>3</sup>,  
Mahsa Dabagh<sup>4</sup>, Parameswara Panicker Sreejith<sup>1,2\*</sup>

**1** Department of Zoology and Advanced Centre for Regenerative Medicine and Stem cell in Cutaneous Research (AcREM-Stem), University of Kerala, Thiruvananthapuram, Kerala, India, **2** Dr. D.Y. Patil Medical College Hospital and Research Center, Dr. D Y Patil Vidyapeeth, Pimpri, Pune, India, **3** Wound Healing and Tissue Repair Analytics Laboratory, School of Biomedical Sciences & Health Care Administration, College of Health Professions and Sciences, University of Wisconsin-Milwaukee, Milwaukee, Wisconsin, United States of America, **4** Department of Biomedical Engineering, College of Engineering & Applied Science, University of Wisconsin, Milwaukee, Wisconsin, United States of America

\* [p.sreejith@gmail.com](mailto:p.sreejith@gmail.com), [psreejith@keralauniversity.ac.in](mailto:psreejith@keralauniversity.ac.in)

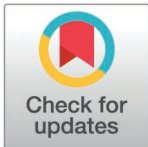

## Abstract

### Background

Hair follicle cycle and the functioning of stem cells in alopecia are influenced by the suppression of cholesterol synthesis and the accumulation of sterol intermediates.

### Objective

This investigation aims to elucidate the regulatory function of disrupted cholesterol homeostasis in the functioning of hair follicle stem cells (HFSCs) and the cycling of hair follicles. Additionally, it seeks to provide an understanding of the fate of stem cells in primary cicatricial alopecia (PCA).

### Methods

To evaluate the influence of cholesterol on the functionality of hair follicles, a study was conducted to analyse gene expression and pathways associated with hair follicle stem cell markers in scalp samples affected by PCA (LPP, FFA, CCCA, DC, DF, TF). To assess the influence of disrupted cholesterol homeostasis on HFSCs, we conducted experiments involving the administration of 7-dehydrocholesterol (7DHC) and BM15766 (Pharmacological inhibitor of cholesterol biosynthesis), to Human Hair Follicle Outer Root Sheath Cells (HORSCs), as well as C57BL/6 mice, and hair follicle organoid cultures. The study utilised reverse transcription polymerase chain reaction (RT-PCR) to assess gene expression, while immunofluorescence was employed to analyse protein expression. The tracking of stem cell fate was accomplished through the utilisation of a BrdU pulse-chase experiment, while the verification of apoptotic consequences was established by utilising the TUNEL assay. A statistical analysis was conducted to assess the statistical significance of the data.

## OPEN ACCESS

**Citation:** Nikhila L, Surya S, Najeeb SH, Binumon TM, Gupta A, Gopalakrishnan S, et al. (2025) Disrupted cholesterol biosynthesis and hair follicle stem cell impairment in the onset of alopecia. PLoS One 20(9): e0308455. <https://doi.org/10.1371/journal.pone.0308455>

**Editor:** Jimin Han, Northwestern University, UNITED STATES OF AMERICA

**Received:** January 29, 2024

**Accepted:** July 23, 2024

**Published:** September 15, 2025

**Copyright:** © 2025 Nikhila et al. This is an open access article distributed under the terms of the [Creative Commons Attribution License](https://creativecommons.org/licenses/by/4.0/), which permits unrestricted use, distribution, and reproduction in any medium, provided the original author and source are credited.

**Data availability statement:** All relevant data are within the paper and [Supporting Information](#) files.

**Funding:** The author(s) received no specific funding for this work.

**Competing interests:** The authors have declared that no competing interests exist.

## Results

There was a notable decrease in the expression of HFSC marker genes among patients afflicted with PCA. *In vitro* data further confirmed the cholesterol inhibition and sterol intermediate accumulation in stem cells, leading to stem cell characteristics' disruption. The experimental group of mice exposed to 7DHC and BM15766 also exhibited a notable inability to initiate hair regrowth. Consequently, this deficiency in hair regrowth resulted in the activation of apoptosis, specifically in the stem cells. Additionally, our confirmatory analysis, which was performed utilising organoid culture, consistently yielded comparable results. The results as mentioned above emphasise the significant importance of cholesterol production in preserving the integrity and functionality of HFSCs, hence providing novel insights into the progression of alopecia.

## Conclusion

Individuals with aberrant cholesterol production, especially those affected by PCA, endure a lasting hindrance in hair regrowth stemming from the irreversible damage to their hair follicles. The observed phenomenon is hypothesized to result from the depletion of hair follicle stem cells. Our study reveals further insights that unveil the previously unrecognized role of sterol intermediates in governing hair follicle cycling and stem cell function in PCA. The modulation of cholesterol production and the accumulation of sterol intermediates significantly influence the hair follicle cycle and the role of stem cells in alopecia.

## 1. Introduction

The skin is a complex organ with appendages like hair follicles, sweat glands, sebaceous glands, and nails [1]. Stem cells are crucial in regenerating these appendages and supporting skin health. Hair follicles, among these, are essential for skin balance and have significant psychological importance. Hair disorders can affect growth, structure, and appearance, impacting self-esteem and quality of life [2]. Understanding the mechanisms behind these disorders is crucial for accurate diagnosis and effective treatment, enhancing patient outcomes.

Alopecia is a persistent dermatological condition characterized by progressive hair loss from the scalp and other body areas. It is an inflammatory disorder primarily affecting hair follicles. The aetiology and pathogenesis of this condition remain incompletely understood; however, it is widely acknowledged as an autoimmune disorder influenced by hereditary and environmental factors [3]. Primary cicatricial alopecia (PCA) is presently managed as an inflammatory condition that results in the irreversible damage of hair follicles. Nevertheless, the therapy options currently accessible for PCA are somewhat restricted and frequently prove inadequate, resulting in a slowdown in the disease's advancement [4]. Primary cicatricial alopecia is classified into three categories based on the predominant inflammatory cell detected during the active phase: lymphocytic (e.g., Lichen Planopilaris, Frontal Fibrosing Alopecia, Central Centrifugal Cicatricial Alopecia, pseudopelade of Brocq), neutrophilic (e.g., Folliculitis Decalvans, Tufted Folliculitis), and mixed (e.g., Dissecting Cellulitis, acne keloidalis nuchae) [5].

Though the exact cause remains elusive, inflammation and the arrival of immune cells are distinctive features of PCA. Recent findings have hinted at the potential involvement of disrupted lipid balance in this context. Connections have been established between changes in cholesterol levels and PCAs [6]. When 7-DHCR is inhibited or exogenous

7-dehydrocholesterol (7-DHC) is introduced to human primary outer root sheath keratinocytes or applied topically to mouse back skin, it produces a pro-inflammatory response. This reaction involves the enhancement of Toll-like receptor and interferon signalling pathways. Additionally, inhibiting cholesterol biosynthesis leads to an elevated TGF $\beta$  [4], a widely recognized trigger of catagen (hair follicle regression) [7] and fibrosis (scarring) [8].

Hair shaft regeneration from hair follicles (HFs) hinges on activating a crucial pool of hair follicle stem cells (HFSCs). This essential mechanism is central to the use of stem cell-based treatment for alopecia. Hair follicle stem cells are located in specific regions within the hair follicle structures like the bulge region [9], lower permanent portion (hair germ) [10], and upper portion of the follicle (infundibulum) [11]. The studies suggest that the bulge area of the follicle is an anatomical niche for the stem cells and is capable of self-renewal [12]. The irreversible damage to the hair follicle stem cell destroys the regenerative capacity of the hair follicle [13]. In studies conducted in transgenic mice, the targeted deletion of epithelial hair follicle stem cells results in the disappearance of the hair follicles [14]. Hair follicle stem cell regeneration depends on a complex network orchestrated by multiple pathways, including the Wnt/ $\beta$ -catenin pathway, Sonic hedgehog (Shh) pathway, Notch pathway, BMP (bone morphogenetic proteins) pathway, and apoptotic pathway. Among these, the Wnt/ $\beta$ -catenin signaling pathway emerges as a pivotal player, with its diverse functions in initiating hair follicle stem cells (HFSCs) activation for promoting hair growth during hair regeneration [15]. Cholesterol modifications are also vital for signal transduction in the Wnt- $\beta$ -catenin and hedgehog pathways [16], both of which are fundamental in the control of human hair follicle (HF) cycling [17]. Therefore, cholesterol is crucial for normal hair follicle biogenesis and enhancing stem cell regeneration. A deeper comprehension of the disrupted cholesterol homeostasis within the realm of HFSC function can unlock new solutions for individuals grappling with persistent hair loss due to PCA. Our quest to shed light on the substantial role of the cholesterol biosynthesis pathway in HFSC function represents a significant stride towards revitalizing hair follicles in those affected by alopecia.

Additionally, our research identifies that modifications in the synthesis of cholesterol in the cells of hair follicles can initiate apoptosis of HFSC, resulting in the irreversible deterioration of hair follicles in mouse skin models and individuals with PCA. The findings mentioned above elucidate a hitherto unrecognized function of cholesterol precursors in the modulation of HFSC activity and their involvement in the pathogenesis of PCA. Additionally, this study demonstrates a novel association between sterols and the functioning of stem cells, which has the potential to significantly transform the field of diagnosing and treating these conditions.

## 2. Materials and methods

### 2.1. Human tissue

In this study, all human subjects involved received explicit approval from the Human Research Ethics Committee of the University of Kerala under Protocol Number: ULECRHS/UOK/2018/35. This approval ensures that the study adhered to ethical guidelines for research involving human participants. Additionally, written informed consent was obtained from all participants prior to their involvement in the study, ensuring that they understood the nature of the research, the risks involved, and their right to withdraw at any time.

The identification of PCA was established through the examination of clinical observations and histopathologic evaluations. People who took part in this study had early-stage lesions that were thought to be signs of lymphocytic (LPP, FFA, CCCA), neutrophilic (TF, FD), or mixed (DC) PCA. To conduct pathway analysis and Real-time PCR analysis, a total of two 4-mm scalp biopsies were obtained from each patient. One biopsy was acquired from the

afflicted region of the scalp, while the other was obtained from an unaffected region. To establish control conditions, we procured scalp biopsy specimens from a cohort of healthy individuals who were matched based on age and sex. The normal controls that were chosen did not display any indications of hair or skin abnormalities. All participants had symptoms of active disease, including erythema, discomfort, gradual alopecia, and indications of inflammation. The participants in this study were individuals who were 18 years of age or older, and they willingly offered their informed consent. A thorough assessment was undertaken, encompassing a review of the patient's medical history, a comprehensive questionnaire pertaining to hair, and an inspection of the hair, scalp, and skin.

The biopsies were conducted following the necessary ethical procedures, including receiving approval from the institutional human ethical committee and obtaining informed consent from all patients and volunteers involved. The tissue samples were stored at a temperature of  $-80^{\circ}\text{C}$  until they were subjected to further processing. The biopsies were employed to extract total RNA, do pathway analysis, and perform real-time PCR.

## 2.2. Human hair follicle outer root sheath cells (HHORSCs)

Human Hair Follicle Outer Root Sheath Cells (HHFORS) were purchased from Science Cell Research, USA. The cells were seeded in 100mm plates at  $0.6 \times 10^6$  density. Experimental treatments included  $25 \mu\text{M}$  7-Dehydrocholesterol (7DHC) and  $4 \mu\text{M}$  BM15766, with Ethanol and Dimethyl Sulfoxide (DMSO) as vehicle controls ( $<0.1\%$  final concentration).

## 2.3. Animal study

All animal experiments were approved by the University of Kerala, Institutional Animal Ethics Committee (IAEC) [Project # IAEC 1-KU-12/21-ZOO-SRP (4)] and were conducted in accordance with the guidelines issued by Committee for the Purpose of Control And Supervision of Experiments on Animals (CPCSEA), Government of India. The study involved doing experiments on C57BL/6 mice that were seven weeks old and an approximate weight of 20g. The mice were allocated into four groups, namely Control, vehicle, 7DHC, and BM15766, with each group comprising six mice. The depilation process was employed to achieve synchronisation of hair development by preserving hair follicles in the telogen phase. The scalp devoid of hair was subjected to topical application of a solution containing 25 millimolar (mM) 7DHC and 4 mM BM15766, which were dissolved in ethanol and dimethyl sulfoxide (DMSO), respectively, for a duration of 15 days. After the study period the experimental animals were euthanized by delivering an intraperitoneal overdose of thiopentone sodium and the carcasses were disposed adhering to the criteris set forth by IAEC.

## 2.4. Human hair follicles

The hair follicles (HFs) were sourced from authorized collaboratirng hair clinic (Renew Hair Clinic) between July 1, 2022 and March 31, 2023. Following a 24-hour incubation at  $37^{\circ}\text{C}$  with  $5\%$   $\text{CO}_2$ , the collected hair follicles underwent treatment with 7DHC and BM15766. Subsequently, RT-PCR, immunofluorescence, and TUNEL apoptotic assays were performed to analyse the treated hair follicles.

The hair follicle (HF) stands out among the various mini-organs within the human body due to its exceptional accessibility for experimental manipulation and ease of complete removal. Interestingly, even when removed from the body, the HF retains some essential *in vivo* characteristics within hair follicle organ culture (HFOC). Furthermore, the HF is unique among mammalian organs undergoing rhythmic and spontaneous cyclical transformations

throughout the host's lifespan. These transformations involve transitioning from a relatively dormant state (telogen) with minimal hair shaft formation and reduced HF size, to prolonged phases of robust and rapid growth.

Anagen VI, terminal hair follicles, have shown successful *ex vivo* growth for a duration of up to two weeks. To achieve this, the micro dissected hair follicles should be cultured in a completely defined, serum-free medium, Williams' E medium. This medium was further enhanced by adding L-glutamine, hydrocortisone, insulin, penicillin, and streptomycin. The cultures were preserved at a constant temperature of 37°C in an atmosphere comprising 5% CO<sub>2</sub> and 95% air [18]. After acclimatization, the hair follicles were grouped into four, control, vehicle, and two treated groups (25mM 7DHC and 4mM BM15766) and the compounds were treated continuously for four days.

## 2.5. RNA Isolation and pathway analysis

The total RNA from each biopsy was extracted using TRIzol reagent (BR Biochem Life Sciences, India) following the manufacturer's instructions. The Ingenuity Pathways Analysis (IPA) software was used to discern the functional importance, cellular localization, and functions within the designated gene products' diverse biological and metabolic processes.

## 2.6. Quantitative Real-Time RT-PCR

We performed RNA extraction following the TRIZOL RNA extraction protocol. SYBR Green-Labelled PCR primers for all targeted genes were purchased from G-Biosciences made in (St. Louis, MO, USA, Cat # 786-5062). Expressions of all targeted genes in PCA, normal scalp samples, HHFORS, mice, and HFs were quantified.

## 2.7. Immunofluorescence

Human Hair Follicle Outer Root Sheath Cells seeded in coverslip for culture. The cells were incubated for 24-48 hours and treated with 25mM 7 DHC, 4mM BM15766 for 24 hours. The cells then underwent washing, fixing, and permeabilization [19] and were incubated with targeted primary antibodies SOX 9, LGR5, and Wnt 5A, purchased from ImmunoTag (St. Louis, MO, USA, Cat# ITT02816). Subsequently, the cells were exposed to DAPI (1µg/ml) as a nuclear tagging agent.

## 2.8. BrdU pulse-chase experiment

Seven-week-old mice were selected for the BrdU pulse-chase experiment (BrdU kit, Invitrogen – Cat no. 8800-6599). The mice were divided into four groups for the experiment: control, vehicle (DMSO/ethanol), 7DHC, and BM15766. The removal of the superficial hair of the mice facilitated the synchronisation of their hair development cycle. The administration of BrdU commenced on the 21st day, which marked the initiation of the anagen cycle. This was followed by a chase period of 6 weeks, after which a second administration of BrdU was conducted on the 56th day. To administer an intraperitoneal injection, a solution containing a concentration of 1 mg of BrdU was generated by diluting it in 200 µL of sterile phosphate-buffered saline (PBS) at a concentration of 5 mg/mL. Subsequently, the mice were administered an intraperitoneal injection of 200 µL (1 mg) of the BrdU solution. The mice were subjected to careful monitoring during the course of the trial. Following the tracking phase, the mice were subjected to euthanasia, and subsequent tissue collection was conducted for the purpose of BrdU analysis.

## 2.9. TUNEL assay

The tissues from treated mice and HFs were used for TUNEL apoptotic detection (In Situ Cell Death Detection Kit, TMR Red, Roche 12156792910). After fixation and antigen retrieval procedures, the tissue sections were subsequently exposed to the complete TUNEL reaction mixture and incubated in darkness for 60 minutes at 37°C. In the case of negative control tissues, only the labelling solution was applied, omitting the addition of terminal transferase. Conversely, the DNase I working solution was incorporated for positive control before proceeding with the labelling steps. After the designated incubation period, the counterstaining step was performed using DAPI at a 5 µg/ml concentration.

## 2.10. Immunostaining for hair follicle

All primary antibodies were obtained from ImmunoTag (St. Louis, MO USA). Cryosectioned hair follicles were permeabilized with 0.1% PBST and underwent antigen retrieval with a 10mM sodium citrate buffer at pH 6. Blocking was achieved using 5% goat serum. Incubation with primary antibodies was conducted overnight at 4 °C. Subsequently, the slides were washed, followed by incubation with secondary antibodies and counterstaining with DAPI.

## 2.11. Transmission electron microscopy of hair follicles

We divided the collected hair follicles into control, vehicle control, dehydrocholesterol (7DHC), and BM15766. We placed the processed samples in an incubator for five days. After treatment, we kept the hair follicles intact for two hours at room temperature in a solution containing 2.5% glutaraldehyde in a 0.1M phosphate buffer with a pH of 7.4. We then subjected the specimens to a series of ethanol solutions containing 50%, 70%, 90%, and 100% to remove moisture. The dehydration process lasted for a duration of ten to fifteen minutes. The samples were infiltrated for two to four hours using a 1:1 combination of acetone and epoxy resin for the embedding procedure. We then transferred them to a pure epoxy resin solution and left them undisturbed for the entire night. We sliced the resin blocks to obtain extremely thin sections, which we then photographed.

## 2.12. Statistical analysis

All experimental results were analysed by one-way analysis of variance ( $p < 0.05$ ) using SPSS software (Ver. 29.0). The data were reported as means with standard deviation, and a P-value below 0.05 was considered statistically significant

# 3. Results

## 3.1. Down-regulated expression of stem cell marker genes (SOX9, LGR5, SHH, WNT 5A) in PCA

A gene expression study using real-time PCR data showed that hair follicle stem cell markers were significantly downregulated in PCA patients. The expression of these markers was much lower in the affected regions than in the unaffected areas. In [Fig 1A](#), it can be observed that the expression of SOX9 is significantly reduced in samples of Folliculitis Decalvans (DF), Dissecting Cellulitis (DC), Lichen Planopilaris (LPP), and Central Centrifugal Cicatricial Alopecia (CCCA) as compared to the control samples. The results of this study indicate a significant decrease in the expression of the LGR5 gene in the following conditions: TF, DF, DC, FFA, LPP, and CCCA, as shown in [Fig 1B](#). The SHH and WNT5A expression patterns are depicted in [Fig 1C](#) and [1D](#), respectively. The expression of SHH was found to be greatly increased in the samples of TF, whereas it was observed to be decreased in the impacted samples of DF,



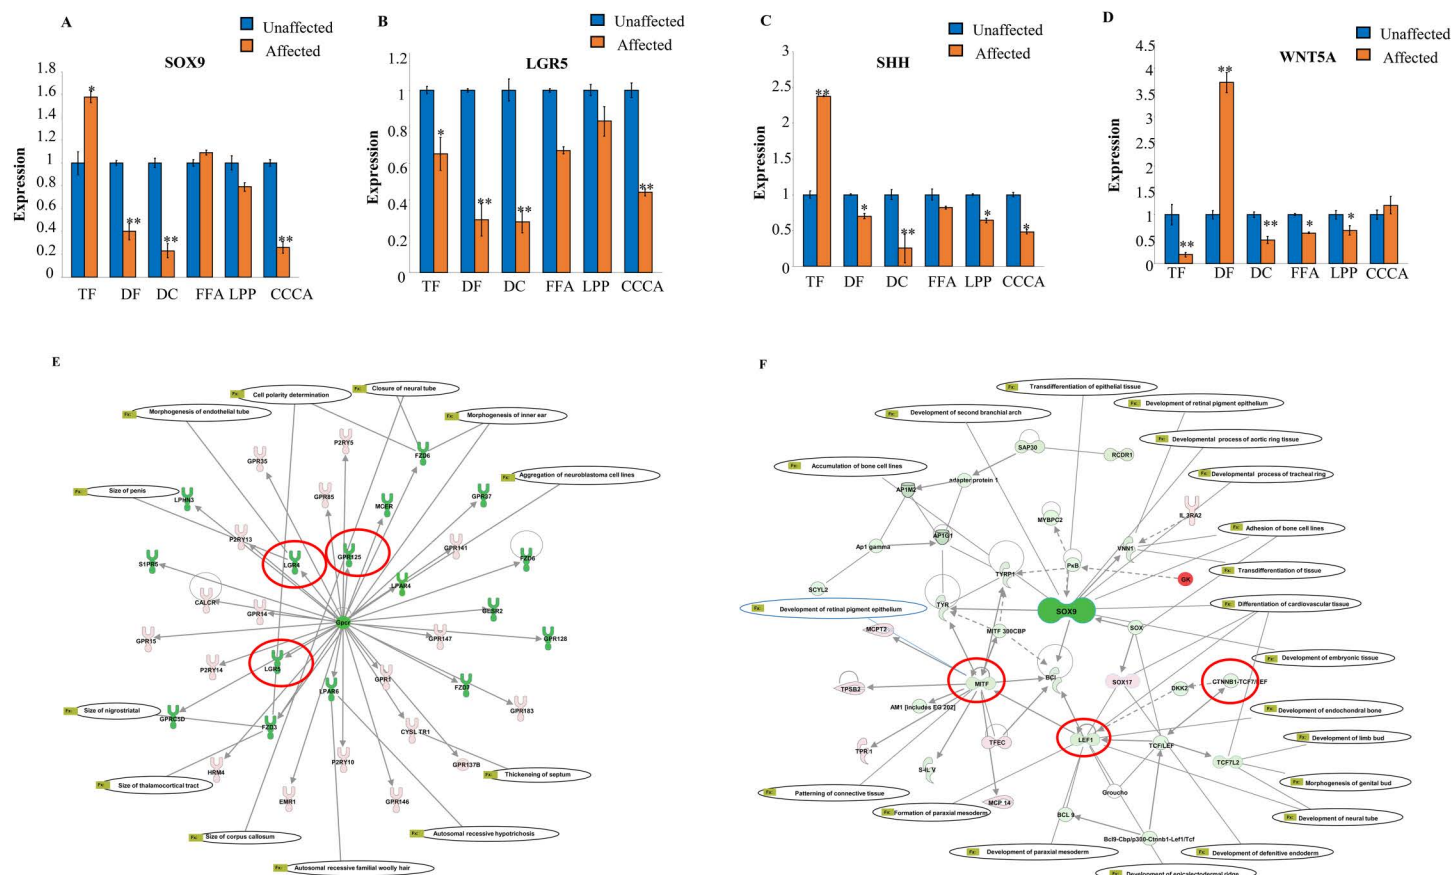

**Fig 1. Down-regulated expression of HFSC marker genes in PCA.** Genes directly and indirectly connected with (A) LGR5 and (B) SOX9 are down-regulated. Nodes, genes; green nodes, genes down-regulated in pathway; pink nodes, genes up-regulated. Line between two nodes represents the corresponding protein products of the genes can physically interact (according to literature). The difference in intensity reflecting the degree of change in the expression of differentially expressed genes in our database. The difference in intensity reflecting the degree of change in the expression of differentially expressed genes in our database. Compared with the unaffected tissue, (C) SOX 9 gene expression was significantly down-regulated in all PCA subtypes DF, DC, LPP, CCCA but not in TF and FFA. The un paired t-test used for statistical analysis. (D) Real time PCR validation of LGR5 gene expression in unaffected and affected skin in the PCA subtypes TF, DF, DC, FFA, LPP, CCCA (\* $p < 0.05$ , \*\* $p < 0.01$ ). Compared with the unaffected tissue, LGR5 gene expression was significantly down-regulated in all PCA samples. The un paired t-test used for statistical analysis. (E) Real time PCR validation of SHH gene expression in unaffected and affected skin in the PCA subtypes TF, DF, DC, FFA, LPP, CCCA (\* $p < 0.05$ , \*\* $p < 0.01$ ). Compared with the unaffected tissue, SHH gene expression was significantly down-regulated in all PCA subtypes DF, DC, FFA, LPP, CCCA but not in TF. The un paired t-test used for statistical analysis. (F) Real time PCR validation of WNT5A gene expression in unaffected and affected skin in the PCA subtypes TF, DF, DC, FFA, LPP, CCCA (\* $p < 0.05$ , \*\* $p < 0.01$ ). Compared with the unaffected tissue, WNT 5A gene expression was significantly downregulated in all PCA subtypes TF, DC, FFA, LPP, CCCA but not in DF. The one way ANOVA was used for the statistical analysis.

<https://doi.org/10.1371/journal.pone.0308455.g001>

DC, FFA, LPP, and CCCA. Results are represented as mean  $\pm$  SD (\* $P \leq 0.05$ , \*\* $P \leq 0.01$ ). The affected samples show significant downregulation of the stem cell marker genes compared with the unaffected.

### 3.2. Pathway analysis of LGR5 and SOX9

The Ingenuity Pathway Analysis (IPA) examined a detailed network of gene interactions involving SOX9 and LGR5. This computational approach meticulously aligns expression data, denoted by color-coded changes—lighter red for upregulation and green for downregulation—against established pathways from extensive databases. In the analysis represented by Fig 1E and 1F, the visualization of transcriptome interactions reveals the degree of gene regulation and the direct

and indirect relationships between genes, *via* solid and dotted lines, respectively. Specifically highlighted are the SOX9 and LGR5 pathways, with a notable downregulation of genes linked to hair follicle stem cell proliferation and hair growth. This decrease, evident in the prevalence of green nodes, suggests a possible disruption in hair follicle function and presents a gateway to investigate the underlying molecular dynamics of hair regeneration. Such findings may deepen our understanding of the hair growth cycle and serve as a springboard for developing targeted hair loss therapies. These insights, while compelling, serve as a starting point for hypotheses and necessitate rigorous experimental validation to confirm their biological significance.

### 3.3. 7DHC or BM15766 inhibits the expression of SOX9, LGR5, WNT5A, and SHH in cultured human hair follicle outer root sheath cells (HHORS)

The experiment's setup involved the administration of 7DHC and BM15766 treatments to HHORS cells, followed by subsequent analysis using real-time PCR. The results demonstrated a notable decrease in the expressions of SOX9, LGR5, WNT5A, and SHH in the treated samples (Fig 2A–G) compared to the control group. The expression of LGR5 exhibited a significant decrease following treatment with both 7DHC and BM15766, as depicted in Fig 2B. Regarding the expression pattern of WNT5A (as depicted in Fig 2D), it was observed that its

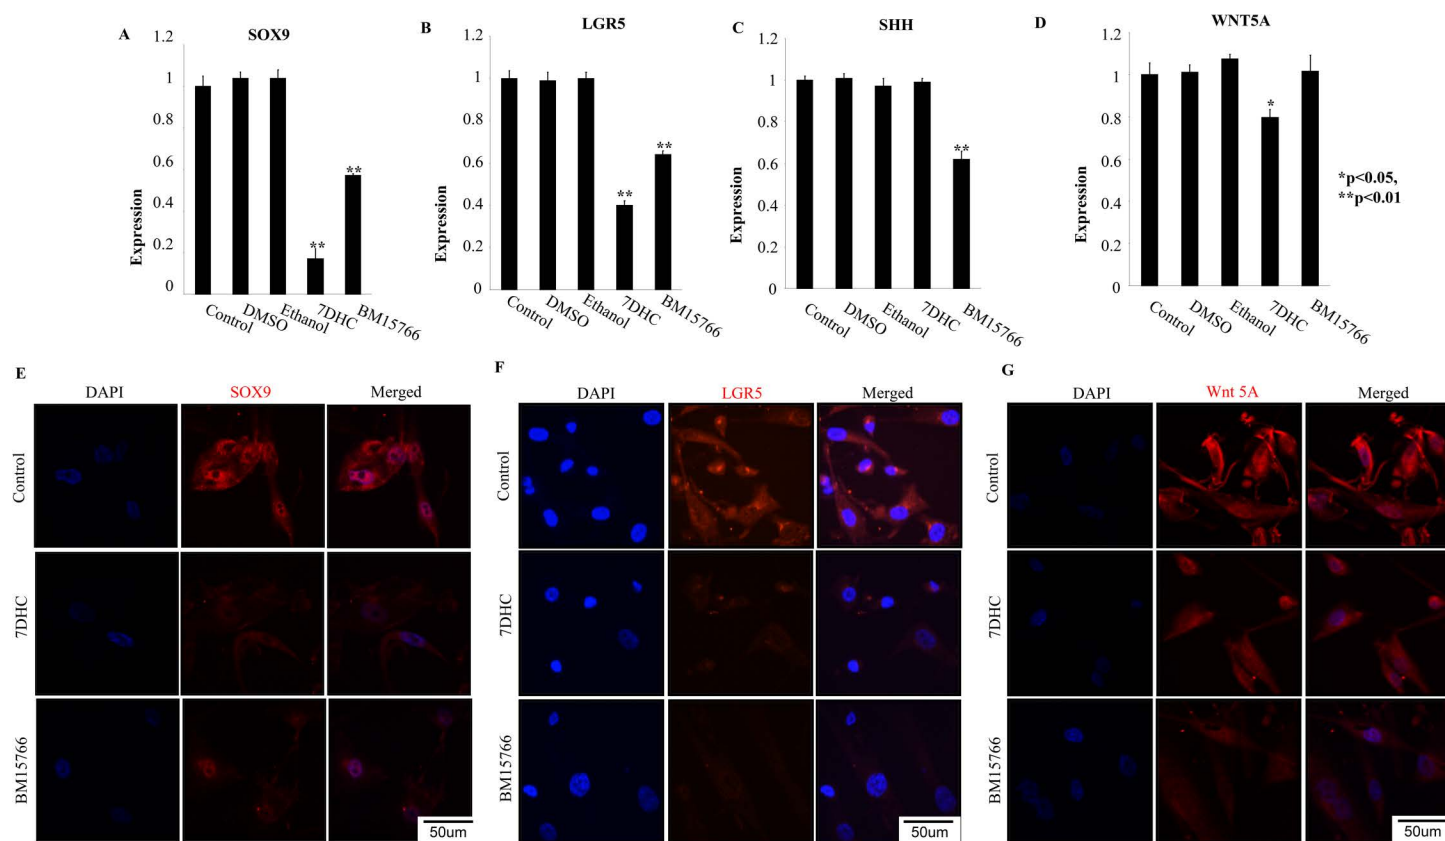

**Fig 2. Inhibited cholesterol biosynthesis downregulates hair follicle stem cell marker genes in in vitro model system.** The real-time PCR validation of (A) SOX9 (B) LGR5 (C) WNT 5A (D) SHH gene expression in 7-DHC and BM15766- treated samples, HHORSs (\* $p < 0.05$ , \*\* $p < 0.01$ ) is shown. Compared with the controls, treated samples show significant down-regulation in the expression of SOX9 and LGR5. The expression of WNT5A, down-regulated in 7DHC. SHH expressions are down-regulated in BM15766 treated Sample but not in 7-DHC. The one way ANOVA was used for the statistical analysis. Treatment with 7-DHC and BM15766 can reduce the expression of some or all of these genes. Immunofluorescence analysis showed that (E) SOX9, (F) LGR5 and (G) Wnt 5A (Red) expressions are down-regulated compared with the control. Staining for the merge of SOX9, LGR5 and WNT 5A with DAPI respectively.

<https://doi.org/10.1371/journal.pone.0308455.g002>



activity was downregulated upon treatment with 7DHC. However, no substantial downregulation was observed in the sample treated with BM15766. The results were expressed as the mean  $\pm$  SD (\* $P \leq 0.05$ , \*\* $P \leq 0.01$ ).

The RT-PCR results were further corroborated through protein expression. The immunofluorescence analysis revealed that, in comparison to the untreated samples, the cells expressing with SOX9, LGR5, and WNT5A were noticeably reduced in the treated samples. Specifically, Fig 2E depicts the diminished expression of SOX9 after treatment with 7DHC and BM15766. In the case of LGR5 (Fig 2F), the treated images demonstrate reduced expressions compared to the control. Similar reductions were observed in the expressions of WNT5A proteins (Fig 2G), as seen with SOX9 and LGR5.

### 3.4. 7DHC and BM15766 halt hair regrowth by altering cholesterol biosynthesis

After administering a 15-day treatment of (Fig 3A) 7DHC and (Fig 3B) BM15766 on the mouse scalp, a comprehensive absence of hair regrowth was detected, suggesting the robust inhibitory properties of both compounds. Based on the observed outcome, it was postulated

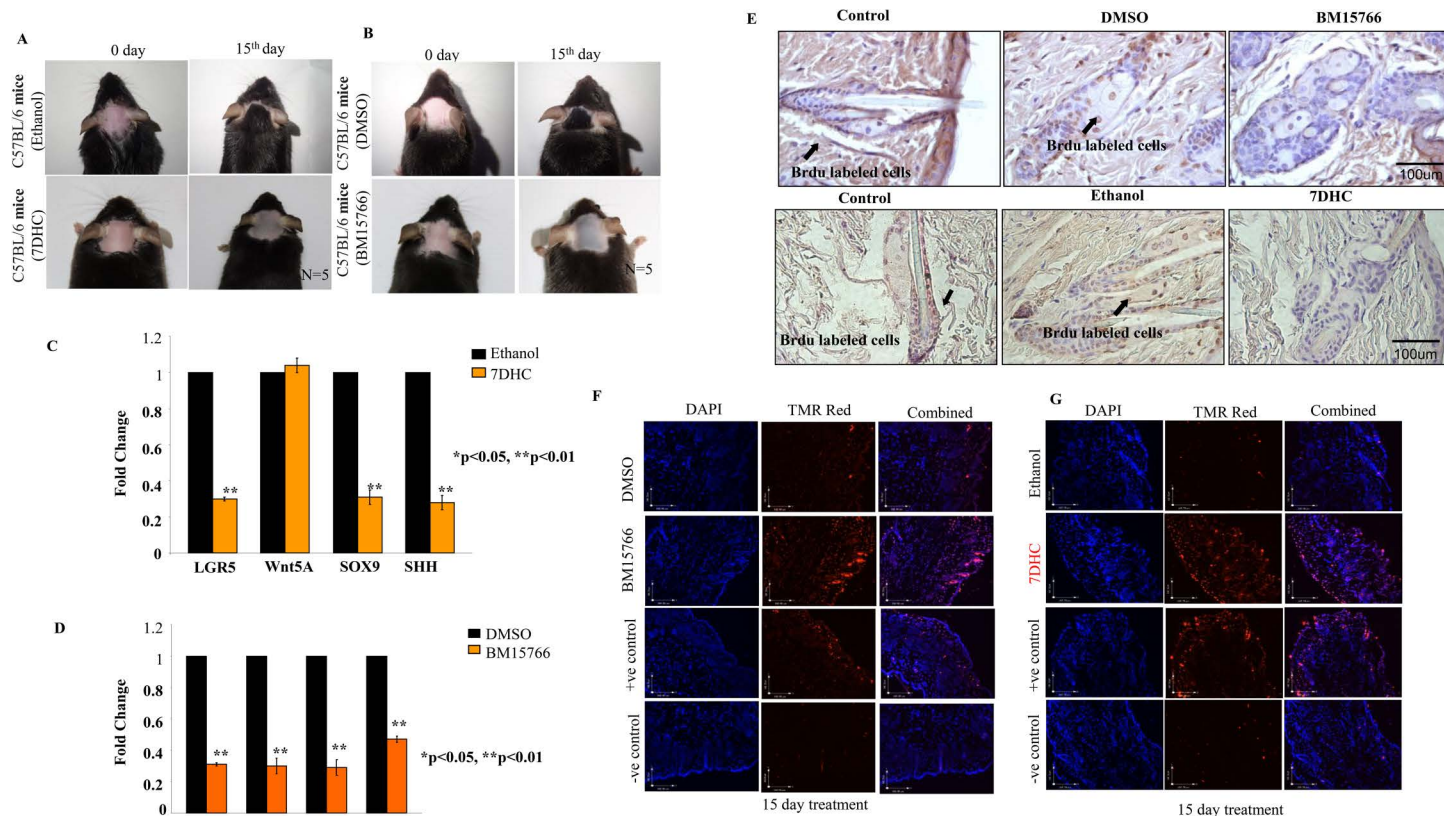

**Fig 3. 7DHC and BM15766 treated mice (C57BL/6; n = 5) failed to regrow the hairs.** Treatment with topical (A) 7DHC and (B) BM15766 resulted in a reduction in hair growth when compared to mice treated with Ethanol/DMSO. However, while hair growth was successfully restored in the mice treated with the vehicle, it did not recover in the treated group. Real-time PCR validation of LGR5, WNT 5A, SOX9 and SHH gene expression in mouse skin treated with (C) 7DHC and (D) BM15766 compared with vehicle-treated (Ethanol/ DMSO) controls (n = 5; \* $p < 0.05$ , \*\* $p < 0.01$ ). Treatment group can down-regulate the expression of some or all of these genes. (E) Labeling with BrdU during the pulse phase and the subsequent chase period, the experiment did not yield conclusive evidence of stem cell populations retaining the BrdU label in 7DHC and BM15766 treated mice. In contrast the control (Ethanol/ DMSO) tissues the experiment showed the presence of BrdU labeling. TMR red imaging revealed a higher number of apoptotic or DNA damaged (red color) cells in the (F) BM15766 and (G) 7DHC treated samples compared to the +ve and vehicle (Ethanol/ DMSO) control group. Tissue counterstained with DAPI(nucleus).

<https://doi.org/10.1371/journal.pone.0308455.g003>

that the diminished hair regeneration could potentially be linked to modified expression patterns of hair follicle stem cell marker genes in the treated samples. To substantiate this hypothesis, we performed a reverse transcription polymerase chain reaction (RT-PCR) study on scalp tissues from mice, specifically targeting prominent stem cell markers such as SOX9, LGR5, SHH, and WNT5A.

The RT-PCR study confirmed our initial hypotheses, as evidenced by the decreased expression of stem cell marker genes in the (Fig 3C) 7DHC and (Fig 3D) BM15766 treated samples compared to the vehicle control. This observation provides more evidence to support the hypothesis that disruptions in the process of cholesterol production could potentially contribute to the compromised ability of hair to regrow and the detrimental effects on hair follicle stem cells. The potential contribution of sterol intermediate buildup resulting from the interruption of cholesterol production pathways to the observed damage in stem cells is worth considering.

### 3.5. *In vivo* 7DHC and BM15766 treated samples exhibits stem cell exhaust

To identify the fate of stem cells, we conducted a BrdU pulse-chase experiment, which aids in locating label-retaining cells in the *in vivo* (Fig 3E) system. During the BrdU pulse phase and the subsequent chase period, the experiment failed to provide conclusive evidence of stem cell populations retaining the BrdU label in BM15766 and 7DHC treated mice. However, in stark contrast, the control tissues treated with DMSO/ethanol exhibited the presence of BrdU labelling. The absence of BrdU-labelled cells in the BM15766 and 7DHC treated mice suggests these compounds might adversely affect stem cell function and differentiation. A plausible hypothesis posits that the suppression of cholesterol production and the buildup of sterol intermediates have a detrimental impact on the functionality of stem cells. Cholesterol and its derivatives are key components in many cellular functions, encompassing the establishment and maintenance of cell membrane integrity, intercellular communication, and the regulation of gene expression. Impairment of these pathways may result in compromised maintenance and proliferation of stem cells.

### 3.6. Increasing proportion of “TUNEL” positive cells in *in vivo* 7DHC and BM5766 treated sample

The disappearance of label-retaining cells in the presence of 7DHC and BM15766 raises intriguing questions about the fate of stem cells and the possibility of apoptosis. The presence of TUNEL-positive cells would provide strong evidence of apoptotic events in the stem cell population. The TMR red imaging demonstrated a notably elevated count of apoptotic or DNA-damaged cells (indicated by the red colour) in the BM15766 (Fig 3F) and 7DHC (Fig 3G) treated samples when compared to both the positive control group and the vehicle (ethanol) control group. The tissue was counterstained with DAPI to visualize cellular structures, highlighting the nuclei accurately.

### 3.7. Effect of inhibited cholesterol biosynthesis and intermediates on human hair follicle organoid culture

The hair follicles were exposed to 7DHC and BM15766 for four days and evaluated the stem cell changes (Fig 4A). No apparent alterations were observed in the hair follicles of the control group during the investigation. Nevertheless, a notable disparity was detected among the group that received treatment, as the length of the follicles exhibited a substantial decrease. The formerly orderly and condensed arrangement exhibits signs of deformation, indicating possible impairment of the stem cell microenvironment. Additionally, there are indications

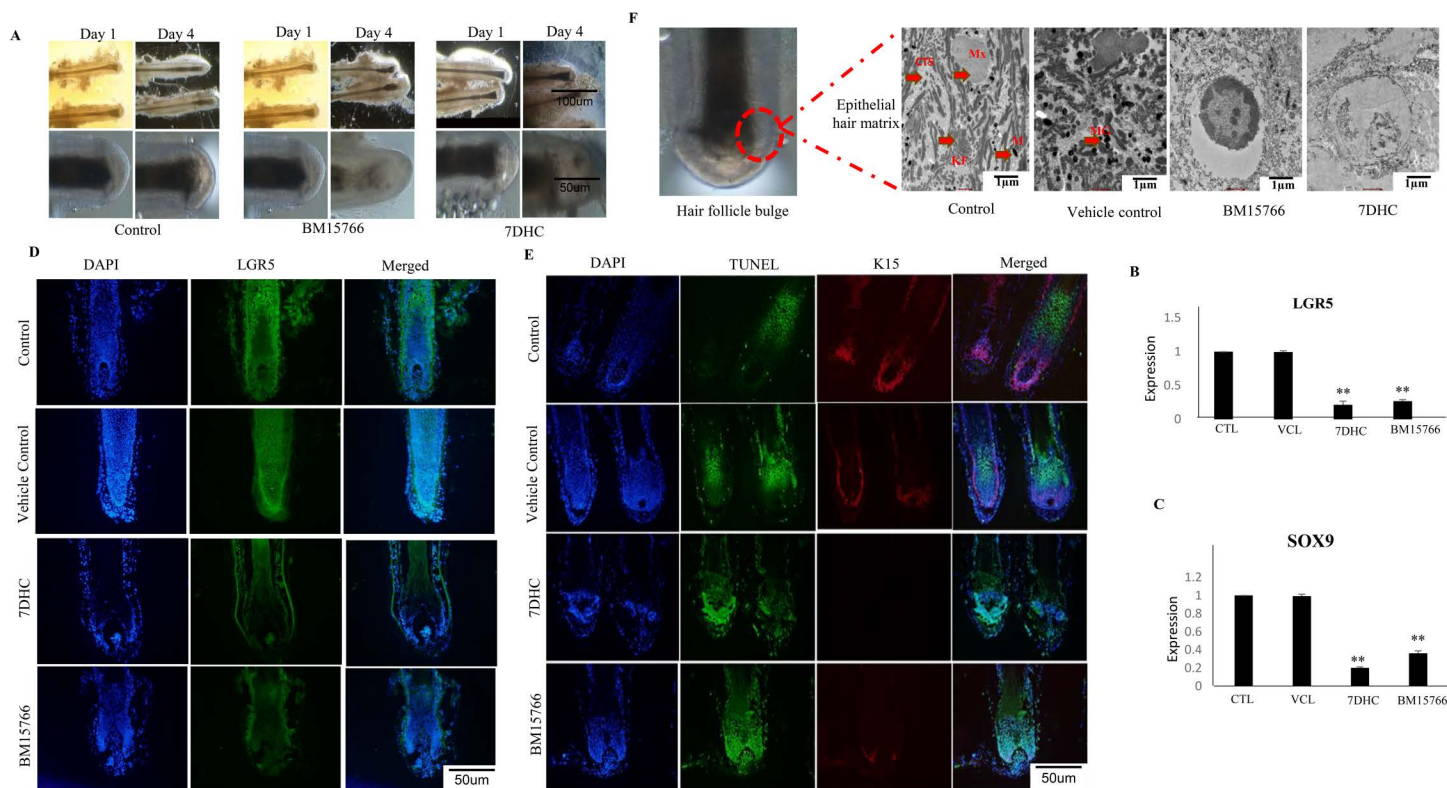

**Fig 4. Inhibitory effect of 7DHC and BM15766 in HF organoid culture.** (A) The diagram provides a visual representation depicting the detrimental effects of BM15766 and 7DHC on the hair follicle bulge. The hair follicle bulge, a critical region housing stem cells. The detrimental impact on the bulge region is indicated by structural alterations, disruption of cellular organization, deterioration of hair matrix and the hair fiber pushed upwards within the follicle. The real-time PCR validation of (B) LGR5 and (C) SOX9 gene expression in 7-DHC and BM15766-treated samples, HF (\* $p < 0.05$ , \*\* $p < 0.01$ ) is shown. Compared with the controls, treated samples show significant down-regulation in the expression of SOX9 and LGR5. The one-way ANOVA was used for the statistical analysis. (D) Immunofluorescence imaging of the LGR5 (Alexa fluor 488) in HF with DAPI counter staining. Compared with the control, treated samples show reduced expression of LGR5. (E) Immunofluorescence imaging of the expression of K15 (Alexa fluor 594) and TUNEL positive cells, of HF treated with 7DHC and BM15766. The HF is counter stained with DAPI and finally merged. The treatment group showed higher apoptotic cells than the control group. Similarly, the expression of K15 was drastically reduced when the HF is exposed to 7DHC and BM15766. (F) TEM analysis of hair follicle (A) Control, (B) Vehicle, (C) BM15766, (D) 7DHC. In (A) control and (B) vehicle control, the sample shows a well-organized structure typical of a hair matrix. Connective tissue sheath that surrounds and supports the matrix cells. Keratin filaments, melanin granules and melanosomes are visible. Minimal intercellular space suggests tight packing of cells, characteristic of the proliferative zone in the hair matrix. While in (C) BM15766 and (D) 7DHC treated samples, the matrix cells ruptured and discontinuous. Melanin granules are sparsely distributed and appear partially degraded. The keratin filaments are fragmented and disorganized. Degraded connective tissue sheath. Matrix (Mx), Keratin filaments (KF), Melanin granules (MG), melanosomes (M), Connective tissue sheath (CTS).

<https://doi.org/10.1371/journal.pone.0308455.g004>

of degradation in the hair matrix, the crucial area responsible for initiating hair fibres. The presence of structural modifications, disrupted cellular arrangement, and degradation of the hair matrix collectively suggest potential disturbances in the functionality of stem cells and the process of hair regeneration.

### 3.8. Human hair follicle stem cell markers were downregulated in *ex vivo* culture

The inhibited cholesterol biosynthetic pathway has demonstrated its ability to impact the functioning of hair follicle stem cells. The obvious down-regulation of stem cell markers serves as evidence that this claim has support from both *in vitro* and *in vivo* model systems. The results were highly promising and further confirmed the negative regulation the inhibited cholesterol biosynthetic pathway imposed on hair follicle stem cell marker genes, including



(Fig 4B) LGR5, (Fig 4C) SOX9. Notably, these marker gene expressions were significantly downregulated, as evidenced by the results presented as mean  $\pm$  SD (\* $P \leq 0.05$ , \*\* $P \leq 0.01$ ).

### 3.9. Unlocked the secrets of hair follicles: 7DHC and BM15766 treatments revealed downregulated LGR5 and apoptosis of K15

Our *in vitro* and *ex vivo* experiments showed that LGR5 expression decreased significantly when cholesterol biosynthesis was stopped. Remarkably, we were able to replicate these similar results during *ex vivo* organ culture, strengthening the robustness of our findings. Consequently, the evidence was unequivocal that follicles treated with 7DHC and BM15766 experienced a pronounced deterioration in LGR5 (Fig 4D) stem cell population, ultimately exerting a substantial influence on the overall hair follicle growth and cycling process. In addition to its presence in the bulge area of hair follicle cells, K15 is a crucial indicator of stem cell populations. Our results revealed a significant down-regulation of K15 (Fig 4E) expression in the treated samples, along with the identification of TUNEL TMR red expressions, indicating the presence of apoptotic cells.

### 3.10. Transmission electron microscopy of hair follicle exposed to 7DHC and BM15766

When comparing the control group and the treated samples, TEM analysis of hair follicles showed clear and specific alterations in the structure at the ultrastructural level. The follicles treated with control and vehicle had healthy matrix cells, with keratin filaments that were tightly packed, an abundance of melanin granules, and melanosomes that were oval-shaped. These characteristics suggest that the cellular health is strong and melanin synthesis is active. However, follicles that were subjected to 7DHC and BM15766 exhibited notable damage, such as abnormal matrix cells, condensation, cell membrane damage, and chromatin condensation. The structural integrity was disrupted due to the presence of sparse and damaged melanin granules, as well as fractured and disordered keratin filaments. The results indicate that exposure to 7DHC and BM15766 causes significant cellular and structural harm to hair follicles, which may result in compromised hair health and impaired follicle function.

## 4. Discussion

The study reveals how cholesterologenic changes and subsequent sterol intermediate accumulation might be responsible for the irreversible damage to hair follicles in individuals affected by PCA. Earlier studies have suggested that the persistent destruction of scalp hair follicles in PCA-affected individuals may be attributed to the depletion of hair follicle stem cells [20]. Our current study provides robust support for these findings, as our data reveals consistent down-regulation of components in the network analysis of signalling pathways (SOX9 & LGR5). Moreover, specific stem cell marker genes, including SOX9, LGR5, SHH, and WNT5A, were significantly downregulated in the scalp of PCA patients, further corroborating our results. Karnik *et al.*, have extensively studied the relationship between PCA and cholesterologenic changes [21]. Their findings suggest that the targeted deletion of PPAR $\gamma$  (a transcription factor involved in regulating lipid homeostasis) in follicular stem cells leads to scarring alopecia. PPAR $\gamma$  significantly influences lipid biosynthesis and inflammatory responses [21]. Notably, PCA patients exhibit a significant decrease in the expression of this transcription factor, indicating its role in lipid biosynthesis and hair follicle cell functioning. Consequently, cholesterologenic changes are deemed to play a crucial role in the inflammatory responses observed in individuals affected by PCA [4]. Based on this data, regulating cholesterol biosynthetic genes and hair follicle stem cell functioning are considered hallmark features of PCA. Hair follicle stem cells are paramount in PCA pathology [22]. When these stem cells are affected for any reason, hair follicles are destroyed, rendering

them incapable of regrowth. Subsequently, the affected hair follicles enter the catagen stage, culminating in the formation of a fibrotic tract and scarring alopecia [23].

Prior research has consistently identified LGR5 as a reliable marker for hair follicle stem cells (HFSC) in the bulge region [24]. LGR5 and its associated signalling molecules play a crucial role in the maintenance and development of hair follicles. Proper LGR5 pathway activation is essential for the continuous renewal of hair follicles and hair regrowth after shedding. However, in individuals affected by PCA, the LGR5 pathway becomes downregulated or has reduced expression. This may result in the depletion or destruction of these stem cells, leading to a reduced ability to regenerate hair. Building upon this previous knowledge, we sought to delve deeper into understanding how changes in cholesterol homeostasis might influence hair follicle stem cell dynamics in PCA. In our *in vitro* analysis we observed significant down-regulation of hair follicle stem cell markers upon treatment with 7DHC and BM15766. 7-dehydrocholesterol is a cholesterol precursor. 7-DHC additionally acts as the biosynthetic precursor for vitamin D3 [25]. The pathophysiology of various human diseases is significantly influenced by the free radical oxidation of cholesterol and its precursors [26]. Our understanding of the membrane properties of 7DHC is limited, particularly its interaction with natural unsaturated lipids. Previous studies on monolayers have indicated that 7DHC exhibits lower membrane condensation compared to cholesterol and desmosterol [27]. BM15766 has been widely used in *in vivo* investigations to examine the mechanisms involved in cholesterol biosynthesis. Its significance in analysing the coordinated regulation of HMG CoA metabolic enzyme expression has been demonstrated by earlier studies [26,28–31]. More specifically, research has shown that BM15766 can lower brain total cholesterol levels [32]. The significance of BM15766 as a pharmacological tool for comprehending cholesterol metabolism and its consequences for hormone synthesis is highlighted by these results. The potential therapeutic relevance of BM15766 in disorders like hypercholesterolemia, which are linked to dysregulated cholesterol metabolism, is suggested by its capacity to modify the expression of the enzyme.

Recent studies have revealed that hair follicles have the capacity for intrafollicular *de novo* biosynthesis of cholesterol, with a key enzyme, 24-dehydrocholesterol reductase (DHCR24), being highly expressed in these follicles. 24-dehydrocholesterol reductase is crucial in converting desmosterol to cholesterol, contributing to the cholesterol levels necessary for proper hair follicle function [33,34].

So, the altered cholesterol biosynthetic pathway using 7DHC and BM15766 also satisfied the previous study's report that the inhibited cholesterol biosynthetic pathway induces the accumulation of sterol intermediates and leads to inflammatory infiltration and further hair loss [4]. While the impact of lipids on hair follicle (HF) biology is well recognized, the precise functions influenced by cholesterol still need to be clarified. Cholesterol's connection with the lipid-rich sebaceous gland in HF suggests its potential significance. Although some associations have been identified between sterol levels and specific hair disorders, the exact role of cholesterol in hair health requires further investigation. Additionally, drug therapies that modulate lipids have been reported to affect hair loss and growth, indicating the complex interplay between lipids and hair physiology [35,36].

The mice receiving 7DHC and BM15766 treatments showed clear signs of epidermal thickening, fibrosis, and a failure to regrow hair. Lipids and their role in hair follicle (HF) biology are crucial, and cholesterol, in particular, has long been suspected of significantly influencing hair growth. We now understand that disruptions in cholesterol balance are intricately tied to conditions like PCA, where hair follicles are permanently damaged, and congenital hypertrichosis, characterized by excessive hair growth due to mutations in cholesterol transporters. Moreover, there's a fascinating connection between abnormal lipid levels in the body, known as dyslipidemia, and androgenic alopecia, a common form of hair loss linked to hormones [6]. Cholesterol plays a crucial role in the physiology of the skin by serving as a fundamental component in maintaining the integrity of the epidermal barrier [37] and serving as a precursor



for the synthesis of steroid hormones [38]. Cholesterol modifications play a crucial role in facilitating signal transduction within the Wnt- $\beta$ -catenin and hedgehog pathways [16], which are essential components in regulating the human hair follicle (HF) cycling process [17].

Additionally, the observed down-regulation of stem cell markers in the treated samples provides further insight into their fate. For example, the N-terminus of Hedgehog (Hh) is altered by adding a fatty acid palmitate to a conserved cysteine residue, while the C-terminus is modified with cholesterol. In the case of WNTs, they undergo palmitoylation on the first conserved cysteine (C77), which is present in all WNT molecules. Genetic evidence indicates that these lipid modifications are essential for localizing WNT and Hh proteins to cell membranes, a prerequisite for their effective function in hair follicle development and cycling [39]. An experiment involving a targeted mutation in the mouse's endogenous Hh gene, specifically the sonic hedgehog gene, revealed that when cholesterol modification is disrupted, it leads to a reduction in the effective range of Hh activity, potentially even resulting in a complete loss of Hh function [40]. Loss of PPAR $\gamma$  [21,41] or the accumulation of sterol precursors [36] can lead to disruptions in fatty acid metabolism and cholesterol biosynthesis. These disruptions can hinder the proper lipid modification of Wnt and Hh proteins, potentially causing interference with hair follicle development and cycling. Through the TUNEL apoptotic assay, it became evident that there was an increased count of apoptotic cells within the treated samples. This finding aligns with the observed decline in stem cells during the label retention pulse-chase experiment.

Our study elucidated the functional characteristics of stem cells at the molecular level, revealing a significant observation regarding the decreased expression of crucial markers associated with hair follicle stem cells. Specifically, the markers SOX9, SHH, LGR5, and WNT 5A were found to be downregulated in hair follicles treated to 7DHC and BM15766. The downregulation described may play a significant role in elucidating the mechanism behind the irreversible degeneration of hair follicles reported in persons affected by PCA. When the expression of these markers is dramatically reduced, it seems to impede the intrinsic capacity of the hair follicle to undergo repair and regeneration. Consequently, the inflammatory process in primary cicatricial alopecia (PCA) causes irreversible damage to the hair follicles, resulting in permanent hair loss that cannot be restored through natural regeneration mechanisms. Comprehending these molecular pathways is of utmost importance in devising tailored interventions and therapies to address the fundamental aetiology of hair loss in individuals afflicted by PCA. This discovery presents opportunities for further investigation and therapeutic approaches focused on reinstating the normal expression of these stem cell markers which may facilitate the regeneration of hair follicles and promote hair growth.

We performed an ultrastructural investigation of hair follicles, which yielded encouraging outcomes in investigating their internal structures at the nanoscale. This research considerably enhanced our comprehension of hair growth and the development of follicles. Tobin *et al.* state that anagen hair follicles have a dermal papilla (DP) that is vascularized and extends into the hair bulb. The DP is connected to the connective tissue sheath (CTS) and is surrounded by an epithelial hair matrix (MX) containing melanocytes and keratinocytes [42]. The boundary between the mesenchyme and the hair follicle epithelium expands during the anagen phase. The peak occurs during the late anagen phase of the hair follicle when the follicular papilla becomes integrated into the center of the epithelial hair bulb [43]. Communication between the follicular papilla and the epithelium of the hair bulb is believed to be the most important part of anagen hair follicles. The substances produced by the follicular papilla cells are believed to control the growth and specialization of the epithelial hair bulbs [44]. During the beginning of the catagen phase, the follicular papilla cells detach from the basal lamina and display cytoplasmic autophagic vacuoles that previously contained synthetic organelles [45]. Moreover, there is a significant decrease in the growth and specialization of hair matrix

keratinocytes, resulting in the completion of hair shaft formation. The proximal hair follicle epithelium undergoes well-coordinated apoptosis, reducing hair follicle length by up to 70% [44]. The hair follicles in our study were damaged due to worsening interactions within the hair matrix. This led to decreased signaling exchanges and a transition to the catagen phase.

Our research, summarized in Fig 5, demonstrates that the cholesterol biosynthesis pathway plays a critical role in maintaining hair follicle (HF) homeostasis and regulating the function

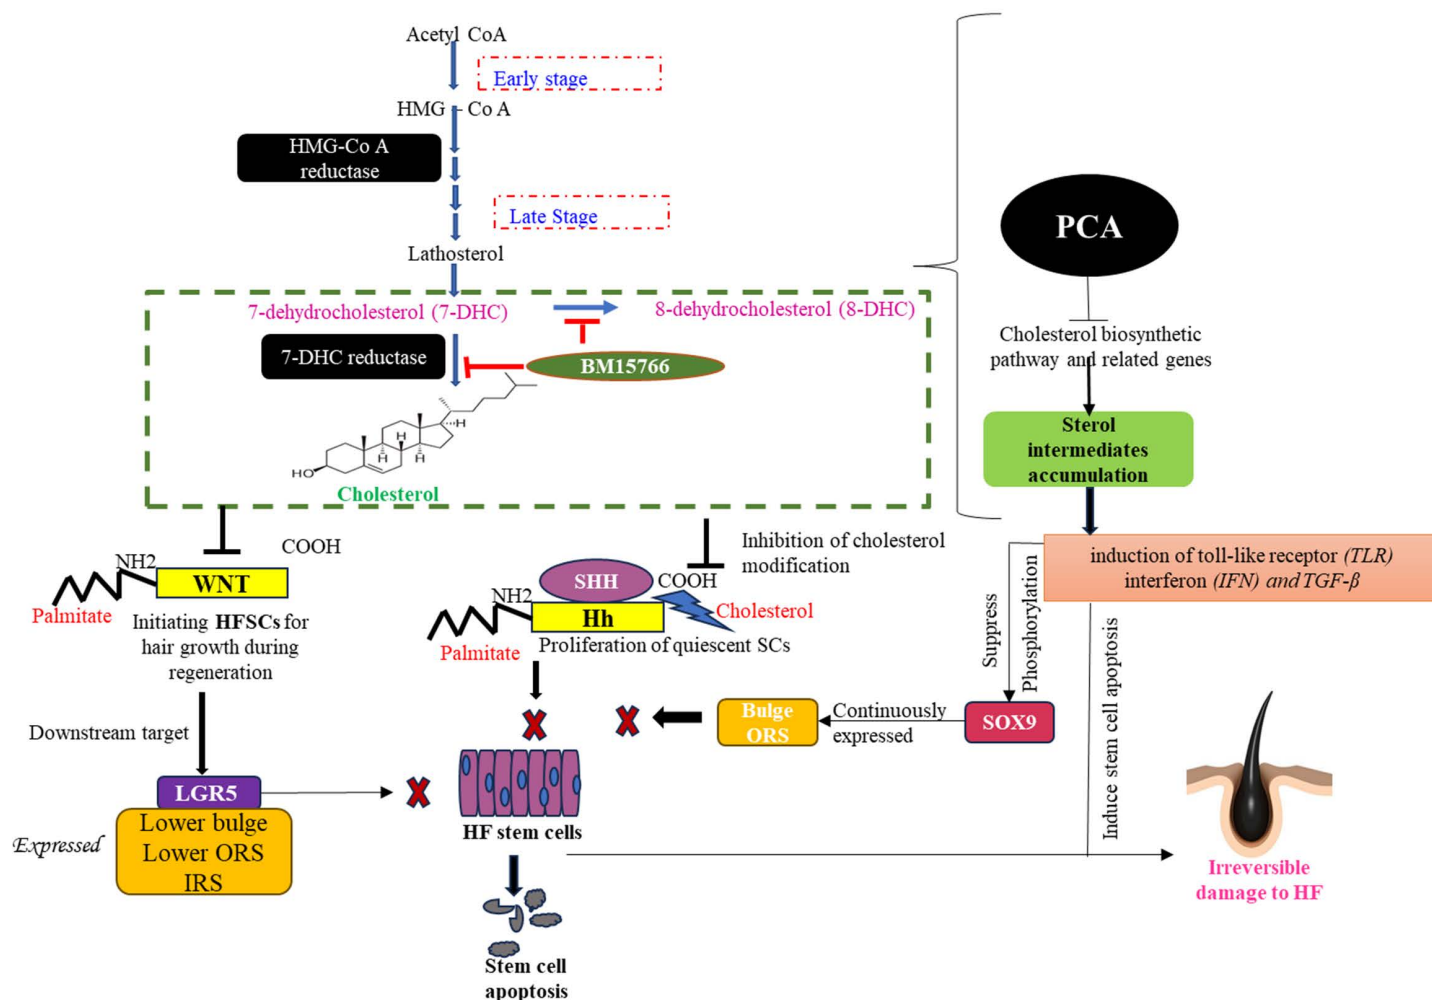

**Fig 5.** In individuals affected by PCA, there is a significant downregulation of genes associated with the cholesterol biosynthetic pathway. This down-regulation results in the accumulation of sterol intermediates, which triggers inflammatory responses within hair follicle (HF) stem cells, ultimately leading to the apoptosis of these stem cells. The inflammatory reactions involve various elements, such as Toll-Like Receptors (TLR), Interferons (IFN), and Transforming Growth Factor-beta (TGF- $\beta$ ). These inflammatory factors collectively have a suppressive effect on the phosphorylation of SOX9, a crucial protein in stem cell proliferation, particularly in the bulge of the Outer Root Sheath (ORS). This suppression further contributes to damage to the stem cells. To understand the mechanistic aspects of this process, we introduce two key compounds, 7-Dehydrocholesterol (7DHC) and BM15766, which artificially alter the cholesterol biosynthetic pathway. These compounds effectively mimic the conditions experienced by PCA-affected individuals. In this altered state of the cholesterol biosynthetic pathway, we find a significant connection with critical stem cell markers, specifically Hh, WNT, LGR5. The N-terminus of Hh is modified by adding palmitate to a conserved cysteine residue, while the C-terminus is modified with cholesterol. Similarly, WNT proteins undergo palmitoylation at their first conserved cysteine. These lipid modifications are crucial for the precise localization of both WNT and Hh proteins and further effective functioning in the development and cycling of hair follicles. In stem cell regeneration, Hh plays a pivotal role in promoting the proliferation of quiescent stem cells, ultimately leading stem cell regeneration. Similarly, WNT signaling is instrumental in regenerating Hair Follicle Stem Cells (HFSCs) during hair growth. The absence of cholesterol modification in Hh and WNT due to the altered cholesterol biosynthetic pathway disrupts stem cell proliferation. Moreover, this disruption affects downstream targets of the WNT pathway, such as LGR5, leading to the failure of its expression in the lower bulge, ORS, and IRS regions. Coupled with the presence of inflammatory cells, this disruption can culminate in the apoptosis of stem cells, ultimately contributing to the pathology observed in PCA-affected individuals.

<https://doi.org/10.1371/journal.pone.0308455.g005>

of resident hair follicle stem cells (HFSCs). Modulating this pathway, therefore, presents a potential target for therapeutic intervention in alopecia and regenerative medicine. This study focused on elucidating mechanisms to improve HFSC survival and resilience, with the aim of mitigating alopecia and advancing our understanding of the complex interplay between tissue regeneration and hair biology. These findings contribute to the development of novel, sustainable approaches for enhancing hair health and aesthetic outcomes.

## Supporting information

### **S1 File. PLOS one clinical studies checklist.**

(DOCX)

### **S2 File. Raw data.**

(DOCX)

**Acknowledgment**We gratefully acknowledge the contributions of the technical staff at the Advanced Centre for Regenerative Medicine and Stem Cell in Cutaneous Research (AcREM-Stem). Their technical expertise and support were invaluable to this research. We also extend our sincere thanks to our collaborators at Dr. D.Y. Patil Medical College Hospital and Research Center and the Wound Healing and Tissue Repair Analytics Laboratory at the University of Wisconsin, Milwaukee, for their vital contributions to this project.

## Author contributions

**Conceptualization:** Leemon Nikhila, Suresh Surya, Shahul Hameed Najeeb, Thankachan Mangalathettu Binumon, Parameswara Panicker Sreejith.

**Data curation:** Leemon Nikhila, Suresh Surya, Shahul Hameed Najeeb, Thankachan Mangalathettu Binumon, Parameswara Panicker Sreejith.

**Formal analysis:** Leemon Nikhila, Suresh Surya, Shahul Hameed Najeeb, Parameswara Panicker Sreejith.

**Investigation:** Leemon Nikhila, Parameswara Panicker Sreejith.

**Methodology:** Leemon Nikhila, Suresh Surya, Shahul Hameed Najeeb, Thankachan Mangalathettu Binumon, Aayush Gupta, Parameswara Panicker Sreejith.

**Project administration:** Sandeep Gopalakrishnan, Parameswara Panicker Sreejith.

**Supervision:** Sandeep Gopalakrishnan, Aayush Gupta, Parameswara Panicker Sreejith.

**Validation:** Sandeep Gopalakrishnan, Leemon Nikhila, Parameswara Panicker Sreejith.

**Visualization:** Leemon Nikhila, Suresh Surya, Shahul Hameed Najeeb, Parameswara Panicker Sreejith.

**Writing – original draft:** Sandeep Gopalakrishnan, Leemon Nikhila, Suresh Surya, Shahul Hameed Najeeb, Thankachan Mangalathettu Binumon, Parameswara Panicker Sreejith.

**Writing – review & editing:** Sandeep Gopalakrishnan, Leemon Nikhila, Aayush Gupta, Parameswara Panicker Sreejith, Mahsa Dabagh.

## References

1. Lee J, Böske R, Tang P-C, Hartman BH, Heller S, Koehler KR. Hair follicle development in mouse pluripotent stem cell-derived skin organoids. *Cell Rep.* 2018;22(1):242–54. Epub 2018/01/04. <https://doi.org/10.1016/j.celrep.2017.12.007> PMID: 29298425; PMCID: PMC5806130
2. Roh C, Lyle S. Cutaneous stem cells and wound healing. *Pediatr Res.* 2006;59(4 Pt 2):100R–3R. Epub 2006/03/22. <https://doi.org/10.1203/01.pdr.0000203572.51876.ba> PMID: 16549556

3. Madani S, Shapiro J. Alopecia areata update. *J Am Acad Dermatol*. 2000;42(4):549–66; quiz 567–70. Epub 2000/03/22. [https://doi.org/10.1016/s0190-9622\(00\)90164-6](https://doi.org/10.1016/s0190-9622(00)90164-6) PMID: 10727299
4. Panicker SP, Ganguly T, Consolo M, Price V, Mirmirani P, Honda K, et al. Sterol intermediates of cholesterol biosynthesis inhibit hair growth and trigger an innate immune response in cicatricial alopecia. *PLoS One*. 2012;7(6):e38449. Epub 2012/06/12. <https://doi.org/10.1371/journal.pone.0038449> PMID: 22685570; PMCID: PMC369908
5. Mirmirani P, Willey A, Headington JT, Stenn K, McCalmont TH, Price VH. Primary cicatricial alopecia: histopathologic findings do not distinguish clinical variants. *J Am Acad Dermatol*. 2005;52(4):637–43. Epub 2005/03/29. <https://doi.org/10.1016/j.jaad.2004.07.069> PMID: 15793514
6. Palmer MA, Blakeborough L, Harries M, Haslam IS. Cholesterol homeostasis: links to hair follicle biology and hair disorders. *Exp Dermatol*. 2020;29(3):299–311. Epub 2019/07/02. <https://doi.org/10.1111/exd.13993> PMID: 31260136
7. Hibino T, Nishiyama T. Role of TGF-beta2 in the human hair cycle. *J Dermatol Sci*. 2004;35(1):9–18. Epub 2004/06/15. <https://doi.org/10.1016/j.jdermsci.2003.12.003> PMID: 15194142
8. Imanishi H, Ansell DM, Chéret J, Harries M, Bertolini M, Sepp N, et al. Epithelial-to-mesenchymal stem cell transition in a human organ: lessons from lichen planopilaris. *J Invest Dermatol*. 2018;138(3):511–9. Epub 2017/11/07. <https://doi.org/10.1016/j.jid.2017.09.047> PMID: 29106928
9. Cotsarelis G, Sun TT, Lavker RM. Label-retaining cells reside in the bulge area of pilosebaceous unit: implications for follicular stem cells, hair cycle, and skin carcinogenesis. *Cell*. 1990;61(7):1329–37. Epub 1990/06/29. [https://doi.org/10.1016/0092-8674\(90\)90696-c](https://doi.org/10.1016/0092-8674(90)90696-c) PMID: 2364430
10. Li L, Mignone J, Yang M, Matic M, Penman S, Enikolopov G, et al. Nestin expression in hair follicle sheath progenitor cells. *Proc Natl Acad Sci U S A*. 2003;100(17):9958–61. Epub 2003/08/09. <https://doi.org/10.1073/pnas.1733025100> PMID: 12904579; PMCID: PMC187900
11. Jahoda CA, Reynolds AJ. Hair follicle dermal sheath cells: unsung participants in wound healing. *Lancet*. 2001;358(9291):1445–8. Epub 2001/11/14. [https://doi.org/10.1016/S0140-6736\(01\)06532-1](https://doi.org/10.1016/S0140-6736(01)06532-1) PMID: 11705511
12. Waters JM, Richardson GD, Jahoda CAB. Hair follicle stem cells. *Semin Cell Dev Biol*. 2007;18(2):245–54. Epub 2007/05/08. <https://doi.org/10.1016/j.semcdb.2007.02.003> PMID: 17481931
13. Harries MJ, Paus R. Scarring alopecia and the PPAR-gamma connection. *J Invest Dermatol*. 2009;129(5):1066–70. Epub 2009/04/17. <https://doi.org/10.1038/jid.2008.425> PMID: 19369934
14. Ito M, Liu Y, Yang Z, Nguyen J, Liang F, Morris RJ, et al. Stem cells in the hair follicle bulge contribute to wound repair but not to homeostasis of the epidermis. *Nat Med*. 2005;11(12):1351–4. Epub 2005/11/17. <https://doi.org/10.1038/nm1328> PMID: 16288281
15. Clevers H, Loh KM, Nusse R. Stem cell signaling. An integral program for tissue renewal and regeneration: Wnt signaling and stem cell control. *Science*. 2014;346(6205):1248012. Epub 2014/10/04. <https://doi.org/10.1126/science.1248012> PMID: 25278615
16. Incardona JP, Eaton S. Cholesterol in signal transduction. *Curr Opin Cell Biol*. 2000;12(2):193–203. Epub 2000/03/14. [https://doi.org/10.1016/s0955-0674\(99\)00076-9](https://doi.org/10.1016/s0955-0674(99)00076-9) PMID: 10712926
17. Lee J, Tumbar T. Hairy tale of signaling in hair follicle development and cycling. *Semin Cell Dev Biol*. 2012;23(8):906–16. Epub 2012/09/04. <https://doi.org/10.1016/j.semcdb.2012.08.003> PMID: 22939761; PMCID: PMC3496046
18. Paus R, Cotsarelis G. The biology of hair follicles. *N Engl J Med*. 1999;341(7):491–7. Epub 1999/08/12. <https://doi.org/10.1056/NEJM199908123410706> PMID: 10441606
19. Wu X-J, Zhu J-W, Jing J, Xue D, Liu H, Zheng M, et al. VEGF165 modulates proliferation, adhesion, migration and differentiation of cultured human outer root sheath cells from central hair follicle epithelium through VEGFR-2 activation in vitro. *J Dermatol Sci*. 2014;73(2):152–60. Epub 2013/12/04. <https://doi.org/10.1016/j.jdermsci.2013.10.002> PMID: 24296159
20. Cotsarelis G, Millar SE. Towards a molecular understanding of hair loss and its treatment. *Trends Mol Med*. 2001;7(7):293–301. Epub 2001/06/27. [https://doi.org/10.1016/s1471-4914\(01\)02027-5](https://doi.org/10.1016/s1471-4914(01)02027-5) PMID: 11425637
21. Karnik P, Tekeste Z, McCormick TS, Gilliam AC, Price VH, Cooper KD, et al. Hair follicle stem cell-specific PPARgamma deletion causes scarring alopecia. *J Invest Dermatol*. 2009;129(5):1243–57. Epub 2008/12/05. <https://doi.org/10.1038/jid.2008.369> PMID: 19052558; PMCID: PMC3130601
22. Harries MJ, Meyer K, Chaudhry I, E Kloeppe J, Poblet E, Griffiths CE, et al. Lichen planopilaris is characterized by immune privilege collapse of the hair follicle's epithelial stem cell niche. *J Pathol*. 2013;231(2):236–47. Epub 2013/06/22. <https://doi.org/10.1002/path.4233> PMID: 23788005

23. Whiting DA, Olsen EA. Central centrifugal cicatricial alopecia. *Dermatol Ther*. 2008;21(4):268–78. Epub 2008/08/22. <https://doi.org/10.1111/j.1529-8019.2008.00209.x> PMID: 18715297
24. Yang R, Zheng Y, Burrows M, Liu S, Wei Z, Nace A, et al. Generation of folliculogenic human epithelial stem cells from induced pluripotent stem cells. *Nat Commun*. 2014;5:3071. Epub 2014/01/29. <https://doi.org/10.1038/ncomms4071> PMID: 24468981; PMCID: PMC4049184
25. Holick MF, Frommer JE, McNeill SC, Richtand NM, Henley JW, Potts JT Jr. Photometabolism of 7-dehydrocholesterol to previtamin D3 in skin. *Biochem Biophys Res Commun*. 1977;76(1):107–14. Epub 1977/05/09. [https://doi.org/10.1016/0006-291x\(77\)91674-6](https://doi.org/10.1016/0006-291x(77)91674-6) PMID: 194588
26. Xu L, Porter NA. Free radical oxidation of cholesterol and its precursors: Implications in cholesterol biosynthesis disorders. *Free Radic Res*. 2015;49(7):835–49. Epub 2014/11/11. <https://doi.org/10.3109/10715762.2014.985219> PMID: 25381800; PMCID: PMC4461549
27. Serfis AB, Brancato S, Fliesler SJ. Comparative behavior of sterols in phosphatidylcholine-sterol monolayer films. *Biochim Biophys Acta*. 2001;1511(2):341–8. Epub 2001/04/05. [https://doi.org/10.1016/s0005-2736\(01\)00291-7](https://doi.org/10.1016/s0005-2736(01)00291-7) PMID: 11286977
28. Baumgart E, Stegmeier K, Schmidt FH, Fahimi HD. Proliferation of peroxisomes in pericentral hepatocytes of rat liver after administration of a new hypocholesterolemic agent (BM 15766). Sex-dependent ultrastructural differences. *Lab Invest*. 1987;56(5):554–64. Epub 1987/05/01. PMID: 3573722
29. Honda A, Salen G, Nguyen LB, Xu G, Tint GS, Batta AK, et al. Regulation of early cholesterol biosynthesis in rat liver: effects of sterols, bile acids, lovastatin, and BM 15.766 on 3-hydroxy-3-methylglutaryl coenzyme a synthase and acetoacetyl coenzyme a thiolase activities. *Hepatology*. 1998;27(1):154–9. Epub 1998/01/13. <https://doi.org/10.1002/hep.510270124> PMID: 9425931
30. Tóth IE, Szalay KS, Szabó D, Pill J. Effect of a cholesterol synthesis inhibitor (BM 15.766) in the presence and absence of HDL on corticosteroidogenesis of isolated zona glomerulosa and fasciculata cells. *J Steroid Biochem Mol Biol*. 1990;37(5):687–91. Epub 1990/12/10. [https://doi.org/10.1016/0960-0760\(90\)90352-1](https://doi.org/10.1016/0960-0760(90)90352-1) PMID: 2177629
31. Yamashita Y, Nishibori M, Terada T, Isobe N, Shimada M. Gonadotropin-induced delta14-reductase and delta7-reductase gene expression in cumulus cells during meiotic resumption of porcine oocytes. *Endocrinology*. 2005;146(1):186–94. Epub 2004/10/02. <https://doi.org/10.1210/en.2004-0617> PMID: 15459117
32. Lütjohann D, Stroick M, Bertsch T, Kühl S, Lindenthal B, Thelen K, et al. High doses of simvastatin, pravastatin, and cholesterol reduce brain cholesterol synthesis in guinea pigs. *Steroids*. 2004;69(6):431–8. Epub 2004/06/29. <https://doi.org/10.1016/j.steroids.2004.03.012> PMID: 15219793
33. Brannan PG, Goldstein JL, Brown MS. 3-hydroxy-3-methylglutaryl coenzyme a reductase activity in human hair roots. *J Lipid Res*. 1975;16(1):7–11. Epub 1975/01/01. [https://doi.org/10.1016/s0022-2275\(20\)36745-6](https://doi.org/10.1016/s0022-2275(20)36745-6) PMID: 162931
34. Mirza R, Qiao S, Murata Y, Seo H. Requirement of DHCR24 for postnatal development of epidermis and hair follicles in mice. *Am J Dermatopathol*. 2009;31(5):446–52. Epub 2009/06/23. <https://doi.org/10.1097/DAD.0b013e318196f10c> PMID: 19542918
35. DeStefano GM, Kurban M, Anyane-Yeboah K, Dall'Armi C, Di Paolo G, Feenstra H, et al. Mutations in the cholesterol transporter gene ABCA5 are associated with excessive hair overgrowth. *PLoS Genet*. 2014;10(5):e1004333. Epub 2014/05/17. <https://doi.org/10.1371/journal.pgen.1004333> PMID: 24831815; PMCID: PMC4022463
36. Evers BM, Farooqi MS, Shelton JM, Richardson JA, Goldstein JL, Brown MS, et al. Hair growth defects in Insig-deficient mice caused by cholesterol precursor accumulation and reversed by simvastatin. *J Invest Dermatol*. 2010;130(5):1237–48. Epub 2010/01/22. <https://doi.org/10.1038/jid.2009.442> PMID: 20090767; PMCID: PMC40229004
37. Wertz PW. Lipids and barrier function of the skin. *Acta Derm Venereol Suppl (Stockh)*. 2000;208:7–11. Epub 2000/07/08. <https://doi.org/10.1080/000155500750042790> PMID: 10884933
38. Slominski A, Zbytek B, Nikolakis G, Manna PR, Skobowiat C, Zmijewski M, et al. Steroidogenesis in the skin: implications for local immune functions. *J Steroid Biochem Mol Biol*. 2013;137:107–23. Epub 2013/02/26. <https://doi.org/10.1016/j.jsbmb.2013.02.006> PMID: 23435015; PMCID: PMC3674137
39. Nusse R. Wnts and Hedgehogs: lipid-modified proteins and similarities in signaling mechanisms at the cell surface. *Development*. 2003;130(22):5297–305. Epub 2003/10/08. <https://doi.org/10.1242/dev.00821> PMID: 14530294
40. Lewis PM, Dunn MP, McMahon JA, Logan M, Martin JF, St-Jacques B, et al. Cholesterol modification of sonic hedgehog is required for long-range signaling activity and effective modulation of signaling by Ptc1. *Cell*. 2001;105(5):599–612. Epub 2001/06/08. [https://doi.org/10.1016/s0092-8674\(01\)00369-5](https://doi.org/10.1016/s0092-8674(01)00369-5) PMID: 11389830



41. Wan Y, Saghatelian A, Chong L-W, Zhang C-L, Cravatt BF, Evans RM. Maternal PPAR gamma protects nursing neonates by suppressing the production of inflammatory milk. *Genes Dev.* 2007;21(15):1895–908. Epub 2007/07/27. <https://doi.org/10.1101/gad.1567207> PMID: [17652179](#)
42. Tobin DJ. Morphological analysis of hair follicles in alopecia areata. *Microsc Res Tech.* 1997;38(4):443–51. Epub 1997/08/15. [https://doi.org/10.1002/\(SICI\)1097-0029\(19970815\)38:4<443::AID-JEMT12>3.0.CO;2-J](https://doi.org/10.1002/(SICI)1097-0029(19970815)38:4<443::AID-JEMT12>3.0.CO;2-J) PMID: [9297694](#)
43. Botchkarev VA, Kishimoto J. Molecular control of epithelial-mesenchymal interactions during hair follicle cycling. *J Invest Dermatol Symp Proc.* 2003;8(1):46–55. Epub 2003/08/05. <https://doi.org/10.1046/j.1523-1747.2003.12171.x> PMID: [12894994](#)
44. Stenn KS, Paus R. Controls of hair follicle cycling. *Physiol Rev.* 2001;81(1):449–94. Epub 2001/01/12. <https://doi.org/10.1152/physrev.2001.81.1.449> PMID: [11152763](#)
45. De Weert J, Kint A, Geerts ML. Morphological changes in the proximal area of the rat's hair follicle during early catagen. An electron-microscopic study. *Arch Dermatol Res.* 1982;272(1–2):79–92. Epub 1982/01/01. <https://doi.org/10.1007/BF00510397> PMID: [7165324](#)
